# Supplementary material for: Tuning second-order NLO responses through halogen bonding
Source: Royal Society of Chemistry journal article supplement (doi:10.1039/b702724a), 2007-01-01
Supplement: b702724a.pdf [file b702724a.pdf]

# Tuning second-order NLO responses through halogen bonding

Elena Cariati,<sup>\*a</sup> Alessandra Forni,<sup>\*b</sup> Serena Biella,<sup>c</sup> Pierangelo Metrangolo,<sup>\*c</sup> Frank Meyer,<sup>c</sup> Giuseppe Resnati,<sup>\*c</sup> Stefania Righetto,<sup>a</sup> Elisa Tordin<sup>a</sup> and Renato Ugo<sup>a</sup>

Receipt/Acceptance Data [DO NOT ALTER/DELETE THIS TEXT]

5 Publication data [DO NOT ALTER/DELETE THIS TEXT]

DOI: 10.1039/b000000x [DO NOT ALTER/DELETE THIS TEXT]

10

## ELECTRONIC SUPPLEMENTARY INFORMATION

---

<sup>a</sup> Dipartimento CIMA and INSTM UdR di Milano and <sup>b</sup>ISTM-CNR, Università di Milano, Via Venezian 21, I-20133 Milano, Italy, Tel: +39 02 5031 4374 (E. C.), 4273 (A. F.); Fax: +39 025031 4405, 4300; E-mail: [elena.cariati@unimi.it](mailto:elena.cariati@unimi.it); [a.forni@istm.cnr.it](mailto:a.forni@istm.cnr.it)

<sup>c</sup> NFM Lab – DCMIC “G. Natta”, Politecnico di Milano, 7, via Mancinelli, I-20131 Milan, Italy, Fax: +39 02 2399 3080; Tel: +39 02 2399 3041 (P. M.), 3032 (G. R.);

E-mail: [pierangelo.metrangolo@polimi.it](mailto:pierangelo.metrangolo@polimi.it); [giuseppe.resnati@polimi.it](mailto:giuseppe.resnati@polimi.it)

† Electronic Supplementary Information (ESI) available: Experimental procedures, characterization, schemes, tables, and details on the theoretical calculations, including a critical discussion of the results, a population analysis of the HOMOs and the LUMOs, and a full description of the simulated spectra; optimized cartesian coordinates of all the examined systems. See <http://dx.doi.org/10.1039/b000000x/>

## Experimental Procedures

### General

Commercial HPLC-grade solvents were used without further purification. Starting materials were purchased from Sigma–Aldrich, Acros Organics, and Apollo Scientific. Reactions were carried out in oven-dried glassware under a nitrogen atmosphere.  $^1\text{H}$  NMR and  $^{19}\text{F}$  NMR spectra were recorded at ambient temperature with a Bruker AV 500 spectrometer. Unless otherwise stated,  $\text{CDCl}_3$  was used as both solvent and internal standard in  $^1\text{H}$  NMR spectra. For  $^{19}\text{F}$  NMR spectra,  $\text{CDCl}_3$  was used as solvent and  $\text{CFCl}_3$  as internal standard. IR spectra were obtained using a Nicolet Nexus FT-IR spectrometer equipped with UATR unit. UV-vis spectra were recorded on a Jasco V-530 spectrophotometer. Chromatographic separations were performed on silica gel 230-400 mesh. The X-ray crystal structures were determined using a Bruker SMART APEX diffractometer. Melting points were determined with a Reichert instrument by observing the melting and crystallising process through an optical microscope. DSC analyses were carried out with a Linkam DSC600 hot stage (10 °C/min).

### Synthesis of *N,N*-dimethyl-4-[(*E*)-2-(2,3,5,6-tetrafluoro-4-iodophenyl)vinyl]aniline (**1a**).

See ref. 4.

### Synthesis of *N,N*-dimethyl-4-[(1*E*,3*E*)-4-(2,3,5,6-tetrafluorophenyl)buta-1,3-dien-1-yl]aniline (**2**).

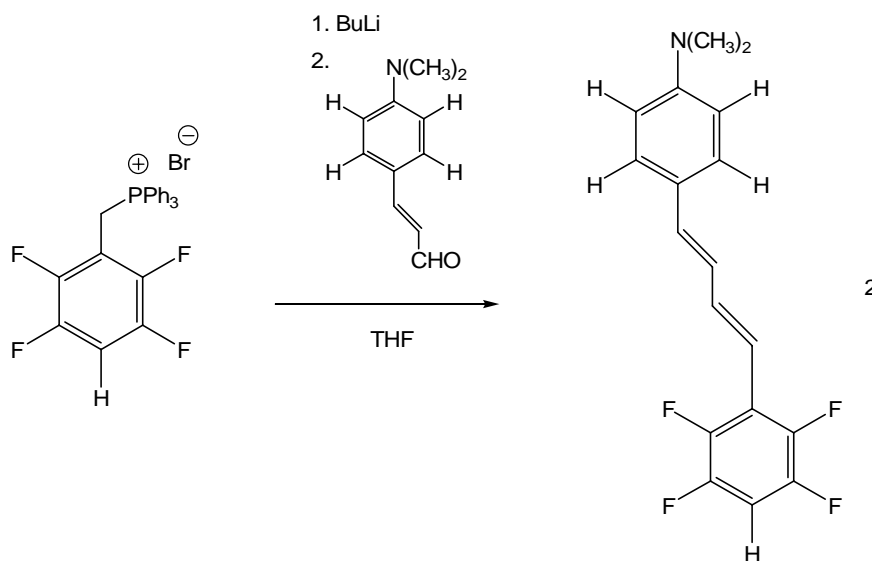

1.40 Mmol of BuLi (1.6 M) are added to a solution of 700 mg (1.17 mmol) of phosphonium bromide in 4 mL of THF at  $-70^\circ\text{C}$ . Then the mixture is warmed up to room temperature, and the solution turns red/black. After 30min, 367 mg (2.10 mmol) of aldehyde are added and the solution is stirred during 24h. Then, the solution is hydrolysed with  $\text{NH}_4\text{Cl}$  and the aqueous phase is extracted 3 times with  $\text{CH}_2\text{Cl}_2$ . The organic layer is dried over  $\text{Na}_2\text{SO}_4$ . The crude material was chromatographed with hexane/ $\text{CH}_2\text{Cl}_2$  1/1 as eluent to give 350 mg of product **2** as a yellow powder (93% yield).

---

M.p. = 140-142°C;  $^1\text{H}$  NMR (500 MHz,  $\text{CDCl}_3$ ) :  $\delta$  7.37 (2H, d,  $J = 8.8$ , H arom.), 7.33 (1H, dd,  $J = 9.5$ ,  $J = 15.9$ , CH), 6.86 (1H, m, H arom.), 6.79 (1H, dd,  $J = 9.5$ ,  $J = 15.5$ , CH), 6.73 (1H, d,  $J = 15.5$ , CH), 6.71 (2H, d,  $J = 8.8$ , H arom.), 6.55 (1H, d,  $J = 15.5$ , CH), 3.02 (6H, s,  $\text{CH}_3$ ) ;  $^{19}\text{F}$  NMR (470 MHz,  $\text{CDCl}_3$ ) :  $\delta$  -144.4 (2F, m), -141.2 (2F, m). GC-MS 321 ( $\text{M}^+$ ).

Synthesis of *N,N*-dimethyl-4-[(1*E*,3*E*)-4-(2,3,5,6-tetrafluoro-4-iodophenyl)buta-1,3-dien-1-yl]aniline (**1b**).

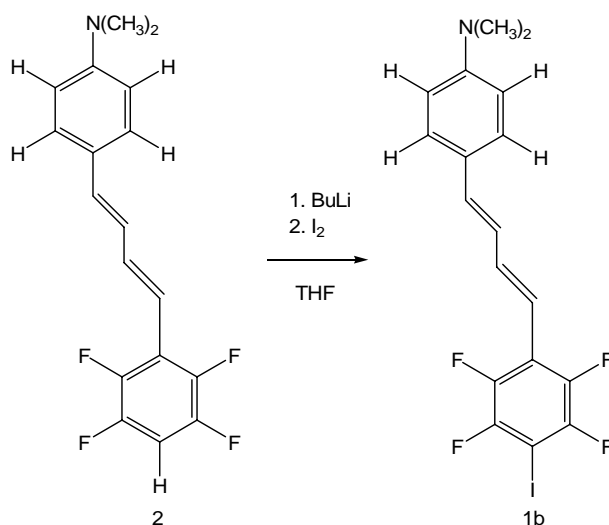

365 Mg (1.14 mmol) of compound were stirred in 5 mL of THF at  $-70^{\circ}\text{C}$ . 1.48 mmol of BuLi (1.6 M) are added and the mixture is warmed up to room temperature. After 30min, the reaction is cooled down at  $-70^{\circ}\text{C}$  and a solution of 376 mg (1.48 mmol) of  $\text{I}_2$  in 1mL of THF is added. After 2h, the solution is warmed up and 439 mg of compound **1b** are filtered off as a yellow powder (86% yield).

M.p. =  $228\text{-}234^{\circ}\text{C}$ ;  $^1\text{H}$  NMR (500 MHz,  $\text{CDCl}_3$ ) :  $\delta$  7.36 (2H, d,  $J = 8.7$ , H arom.), 7.32 (1H, m, CH), 6.76 (2H, m, CH), 6.69 (2H, d,  $J = 8.7$ , H arom.), 6.50 (1H, d,  $J = 15.9$ , CH), 3.00 (6H, s,  $\text{CH}_3$ ) ;  $^{19}\text{F}$  NMR (470 MHz,  $\text{CDCl}_3$ ) :  $\delta$  -142.1 (2F, m), -123.1 (2F, m). MS (ESI)  $m/z$  447.8 ( $\text{M}+\text{H}$ ) $^+$ .

*Scheme 2.*

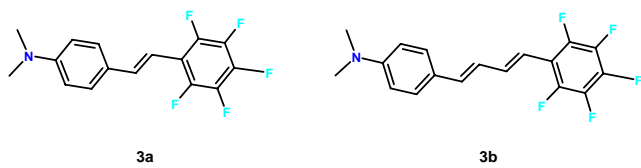

<sup>19</sup>F NMR Experiments.

The samples were prepared by addition of 100 eq. of XB-acceptor solvents to 0.5 mL of a solution 5x10<sup>-3</sup> M of **1b** in CDCl<sub>3</sub>. Chemical shifts were recorded by using CFC<sub>3</sub> as external reference.

**Table 3.**

| XB-acceptor solvent       | $\Delta\delta^a = \delta_{\mathbf{1b}} \text{ in CHCl}_3 - \delta_{\text{used solvent}}$ | $\Delta\delta^b = \delta_{\mathbf{1b}} \text{ in CHCl}_3 - \delta_{\text{used solvent}}$ |
|---------------------------|------------------------------------------------------------------------------------------|------------------------------------------------------------------------------------------|
| -                         | -                                                                                        | -                                                                                        |
| QUI                       | 0.65                                                                                     | 0.54                                                                                     |
| PIP                       | 0.28                                                                                     | 0.20                                                                                     |
| DMF                       | 0.08                                                                                     | 0.09                                                                                     |
| Dioxane                   | 0.04                                                                                     | 0.04                                                                                     |
| 2,2',5,5'-tetramethyl-PIP | 0.03                                                                                     | 0.07                                                                                     |

<sup>a</sup>: variation calculated on the peak at -123.1 ppm (see above);

<sup>b</sup>: variation calculated on the peak at -142.1 ppm (see above).

*UV-vis absorption spectra*

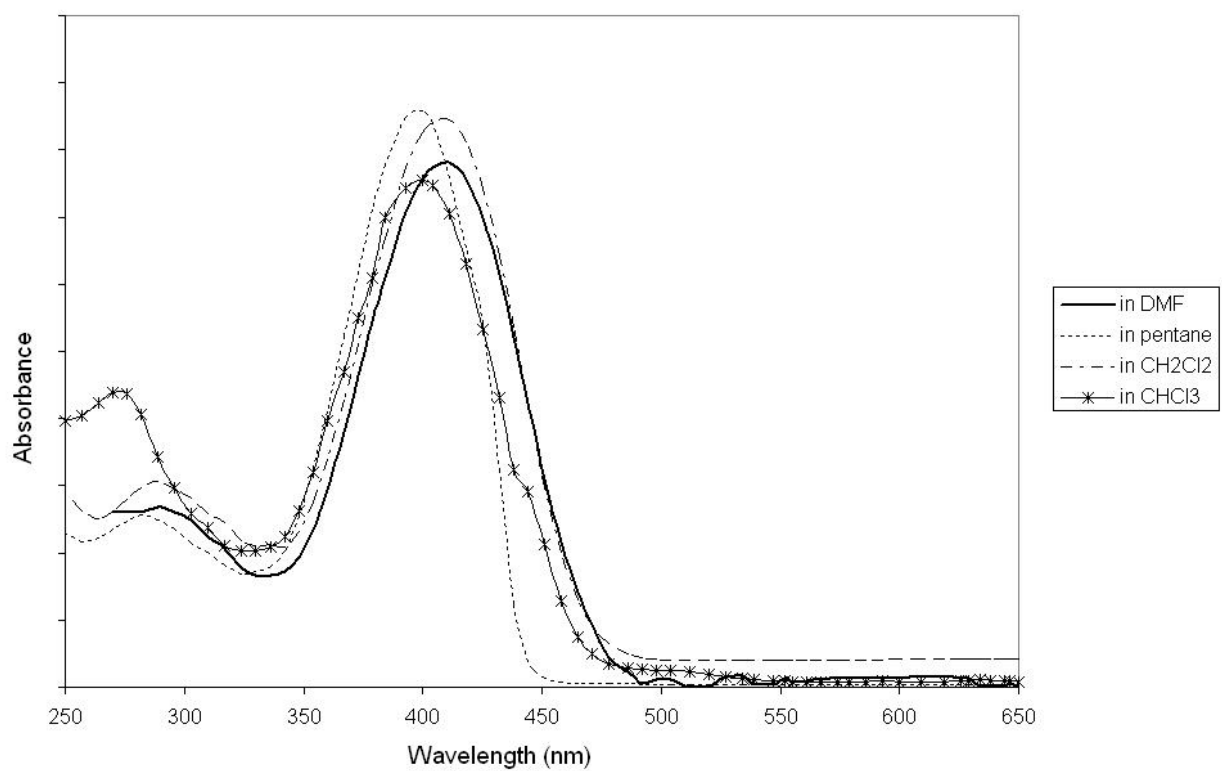

UV-vis absorption spectra of compound **1b** in different solvents

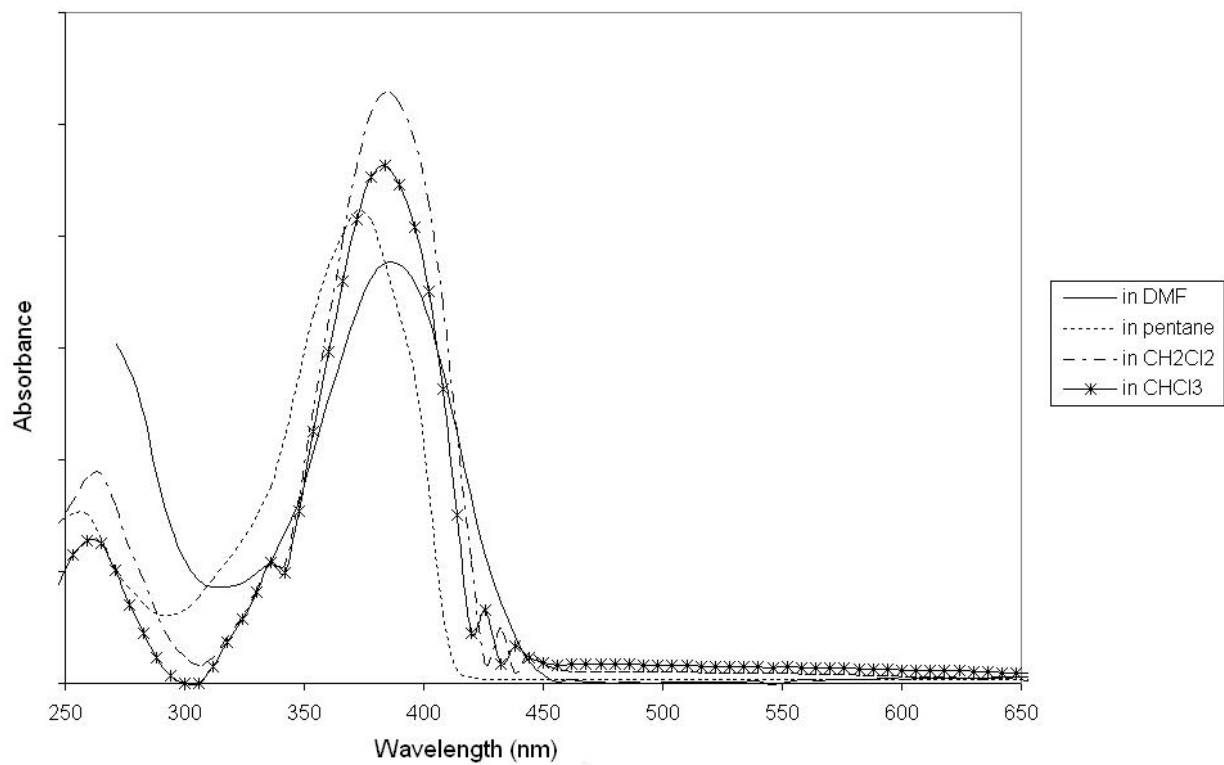

UV-vis absorption spectra of compound **2** in different solvents



## Details on DFT and TDDFT calculations

Geometry optimisations<sup>8</sup> of compounds **1a**, **1b**, **2** and of dimers of **1a** with DMF (**1a**·DMF), piperidine (**1a**·PIP) and quinuclidine (**1a**·QUI) were performed within the DFT approach, using the B3LYP functional and the 3-21G\*\* basis set. The good agreement between computed and experimental, when available, bond lengths (see Table 4 and Figure S1 for atom numbering) indicates the suitability of the chosen approach, in spite of the relatively small basis set (due to unavailability of larger basis set for iodine). Moreover, in the case of compound **2**, lacking of iodine, we performed another geometry optimisation with the 6-31G\*\* basis set, obtaining a dipole moment, 5.89 D, very similar to the one determined with the 3-21G\*\* basis set (6.10 D). In Tables 10-15 the optimised B3LYP/3-21G\*\* Cartesian coordinates of all investigated systems are reported.

The optimised geometries of **1a**, **1a**·DMF, **1a**·PIP and **1a**·QUI were then used for TDDFT calculations<sup>7</sup> of electronic spectra and hyperpolarizability tensors,  $\beta$ . These calculations were performed with the ADF triple-zeta polarized Slater-type orbital basis set ‘TZP’ for all atoms, using the Van Leeuwen–Baerends (LB94) exchange-correlation potential. The quantity  $\beta_\lambda$  was derived from the  $\beta_{ijk}$  elements according to  $\beta_\lambda = (\mu_x\beta_x + \mu_y\beta_y + \mu_z\beta_z)/\mu$ , where  $\beta_i = \beta_{iii} + (1/3)\sum_{j\neq i}(\beta_{ijj} + \beta_{jji} + \beta_{jji})$  are the components of vector  $\beta_{tot}$ . The ADF  $\beta_{ijk}$  components already converted to be compared with the experimental values have been used.<sup>S1</sup>

The properties of the more significant transitions (i.e. with  $f > 0.05$ ,  $f$  being the oscillator strength) for **1a**, **1a**·DMF, **1a**·PIP and **1a**·QUI are reported in Table 5. In all cases, the HOMO→LUMO appears as the most significant transition at  $\lambda=445$ , 454, 448 and 447 nm for **1a**, **1a**·DMF, **1a**·PIP and **1a**·QUI, respectively (see Tables 6-9 for a population analysis of the HOMO and the LUMO of each optimised structure). The observed difference between the calculated and the experimental transition energies, amounting to 0.46 eV for **1a**, is in the range of the errors normally found when computing electronic spectra of relatively large systems.<sup>S2</sup> Besides the HOMO→LUMO transition, the computed spectra show essentially other two minor transitions at higher energies. The former one (at  $\lambda=357$ , 383, 376 and 374 nm for **1a**, **1a**·DMF, **1a**·PIP and **1a**·QUI, respectively) is principally a HOMO-1→LUMO transition, where the HOMO-1 is a  $\pi$  orbital essentially localized on the iodine atom. The latter one (at  $\lambda=301$ -302 nm for all systems) is a transition from a  $\pi$  orbital localized on I, N and the ethylenic bond towards the LUMO. The experimental spectrum of **1a** in chloroform showed only the former of these minor transitions, due to the solvent cut off, as a very weak band at 288 nm.

For each of the dimers **1a**·DMF and **1a**·PIP, another transition was obtained, which is very close to, and partially mixed with the HOMO→LUMO transition for **1a**·DMF ( $\lambda=442$  nm) and the HOMO-1→LUMO transition for **1a**·PIP ( $\lambda=367$  nm). Clearly, in both cases the two transitions are too close to be resolved in the experimental spectra. In the case of **1a**·DMF, this further transition is a HOMO→LUMO+1, where the LUMO+1 describes the  $\pi^*$  system of DMF. For the dimer **1a**·PIP, it is a transition from a  $\sigma$  orbital localized on the nitrogen atom of piperidine towards the LUMO.

Finally, it is to be noted that, from calculations, the only electronic transition showing a significant change due to XB formation is the intermediate one, which shifts in all cases towards lower energies, still maintaining its HOMO-1→LUMO character. Experimentally this weak band cannot be seen other than in chloroform. The computed red-shift is slightly more pronounced for DMF ( $\Delta\lambda=26$ nm) with respect to piperidine and quinuclidine ( $\Delta\lambda=19$  and 17nm, respectively), in

apparent contrast with the computed trend of the XB interaction strength, indicating that no simple relation does exist between the two quantities.

## References

(8) (full reference) Frisch, M. J.; Trucks, G. W.; Schlegel, H. B.; Scuseria, G. E.; Robb, M. A.; Cheeseman, J. R.; Zakrzewski, V. G.; Montgomery Jr., J. A.; Stratmann, R. E.; Burant, J. C.; Dapprich, S.; Millam, J. M.; Daniels, A. D.; Kudin, K. N.; Strain, M. C.; Farkas, O.; Tomasi, J.; Barone, V.; Cossi, M.; Cammi, R.; Mennucci, B.; Pomelli, C.; Adamo, C.; Clifford, S.; Ochterski, J.; Petersson, G. A.; Ayala, P. Y.; Cui, Q.; Morokuma, K.; Malick, D. K.; Rabuck, A. D.; Raghavachari, K.; Foresman, J. B.; Cioslowski, J.; Ortiz, J. V.; Baboul, A. G.; Stefanov, B. B.; Liu, G.; Liashenko, A.; Piskorz, P.; Komaromi, I.; Gomperts, R.; Martin, R. L.; Fox, D. J.; Keith, T.; Al-Laham, M. A.; Peng, C. Y.; Nanayakkara, A.; Challacombe, M.; Gill, P. M. W.; Johnson, B.; Chen, W.; Wong, M. W.; Andres, J. L.; Gonzalez, C.; Head-Gordon, M.; Replogle, E. S.; Pople, J. A. *Gaussian 98*, Revision A.11.3; Gaussian, Inc.: Pittsburgh, PA, **2002**.

(S1) Willets, A.; Rice, J. E.; Burland, D. M.; Shelton, D. P. *J. Chem. Phys.*, **1992**, *97*, 7590-7599).

(S2) Grimme S. *Calculation of the Electronic Spectra of Large Molecules*. In *Reviews in Computational Chemistry, Vol. 20*; Lipkowitz, K. B., Larter, R., Cundari, T. R., Eds.; Wiley-VCH: New York, **2004**.

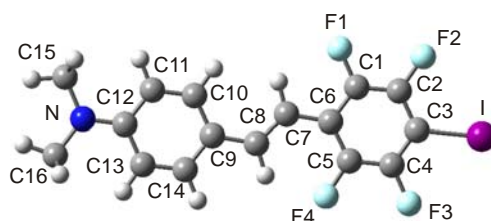

**Figure S1.** B3LYP/3-21G\*\* optimized geometry of compound **1a** with atom numbering.

**Table 4.**

Selected geometrical parameters in optimised B3LYP/3-21G\*\* structures of **1a**, **1b**, **2** and dimers **1a**·DMF, **1a**·PIP, **1a**·QUI, compared with experimental data<sup>4</sup> (in parentheses) if available. Bond lengths in Ångström.

|                   | <b>1a</b>                  | <b>1b</b>                  | <b>2</b> | <b>1a</b> ·DMF | <b>1a</b> ·PIP | <b>1a</b> ·QUI |
|-------------------|----------------------------|----------------------------|----------|----------------|----------------|----------------|
| I–C3              | 2.110 (2.087) <sup>a</sup> | 2.110 (2.080) <sup>b</sup> |          | 2.129          | 2.152          | 2.154          |
| C1–F1             | 1.371 (1.347)              | 1.370 (1.350)              | 1.370    | 1.373          | 1.373          | 1.373          |
| C2–F2             | 1.363 (1.340)              | 1.363 (1.346)              | 1.365    | 1.367          | 1.368          | 1.368          |
| C4–F3             | 1.364 (1.352)              | 1.364 (1.341)              | 1.366    | 1.367          | 1.368          | 1.368          |
| C5–F4             | 1.373 (1.344)              | 1.373 (1.342)              | 1.373    | 1.375          | 1.376          | 1.376          |
| C7–C8             | 1.354 (1.331)              | 1.358 (1.338)              | 1.357    | 1.352          | 1.352          | 1.352          |
| N–C <sub>ar</sub> | 1.378 (1.389)              | 1.379 (1.387)              | 1.379    | 1.381          | 1.381          | 1.381          |
| I...O(N)          |                            |                            |          | 2.668          | 2.688          | 2.678          |

<sup>a</sup> Experimental data from ref. 4; <sup>b</sup> experimental data to be published.

**Table 5.**

Computed TDDFT spectra of **1a** and its dimers with DMF, piperidine and quinuclidine: wavelengths ( $\lambda$ , nm), oscillator strengths (f) and transition dipole moments ( $\mu_{eg}$ , D).

| <b>1a</b> |      |            | <b>1a</b> · DMF |      |            | <b>1a</b> · PIP |      |            | <b>1a</b> · QUI |      |            |
|-----------|------|------------|-----------------|------|------------|-----------------|------|------------|-----------------|------|------------|
| $\lambda$ | f    | $\mu_{eg}$ | $\lambda$       | f    | $\mu_{eg}$ | $\lambda$       | f    | $\mu_{eg}$ | $\lambda$       | f    | $\mu_{eg}$ |
| 445       | 0.97 | 9.59       | 454             | 0.76 | 8.54       | 448             | 1.11 | 10.30      | 447             | 1.14 | 10.39      |
|           |      |            | 442             | 0.34 | 5.66       |                 |      |            |                 |      |            |
| 357       | 0.25 | 4.39       | 383             | 0.08 | 2.48       | 376             | 0.06 | 2.12       | 374             | 0.12 | 3.06       |
|           |      |            |                 |      |            | 367             | 0.06 | 2.25       |                 |      |            |
| 301       | 0.37 | 4.87       | 302             | 0.39 | 4.99       | 301             | 0.47 | 5.48       | 302             | 0.61 | 6.26       |

**Table 6.**

Populations (%) of the Molecular Orbitals (MO) principally involved (weight=0.91) in the strongest TDDFT transition of compound **1a** ( $\lambda=445$  nm,  $f=0.97$ , see Table 5). Atom numbering (in parentheses) as in Figure S1.

| E(eV)   | Occupation | MO        | %      | Atomic Orbital | Atom      |        |       |         |
|---------|------------|-----------|--------|----------------|-----------|--------|-------|---------|
| -10.045 | 2.00(HOMO) | 63 A      | 25.01% | 1 P:z          | 34 N(N)   |        |       |         |
|         |            |           | 13.72% | 1 P:z          | 10 C(C9)  |        |       |         |
|         |            |           | 12.90% | 1 P:z          | 2 C(C7)   |        |       |         |
|         |            |           | 8.60%  | 1 P:z          | 12 C(C13) |        |       |         |
|         |            |           | 7.19%  | 1 P:z          | 14 C(C11) |        |       |         |
|         |            |           | 6.00%  | 1 P:z          | 13 C(C12) |        |       |         |
|         |            |           | 3.62%  | 1 P:z          | 7 C(C3)   |        |       |         |
|         |            |           | 3.18%  | 1 P:z          | 1 I(I)    |        |       |         |
|         |            |           | 2.72%  | 1 P:z          | 9 C(C1)   |        |       |         |
|         |            |           | 2.72%  | 1 P:z          | 5 C(C5)   |        |       |         |
|         |            |           | 1.77%  | 1 P:z          | 15 C(C10) |        |       |         |
|         |            |           | -7.988 | 0.00(LUMO)     | 64 A      | 20.75% | 1 P:z | 3 C(C8) |
|         |            |           |        |                |           | 15.90% | 1 P:z | 7 C(C3) |
|         |            |           |        |                |           | 12.22% | 1 P:z | 4 C(C6) |
| 8.28%   | 1 P:z      | 5 C(C5)   |        |                |           |        |       |         |
| 7.53%   | 1 P:z      | 2 C(C7)   |        |                |           |        |       |         |
| 6.67%   | 1 P:z      | 13 C(C12) |        |                |           |        |       |         |
| 6.63%   | 1 P:z      | 15 C(C10) |        |                |           |        |       |         |
| 4.72%   | 1 P:z      | 9 C(C1)   |        |                |           |        |       |         |
| 4.67%   | 1 P:z      | 11 C(C14) |        |                |           |        |       |         |
| 3.77%   | 1 P:z      | 8 C(C2)   |        |                |           |        |       |         |
| 3.51%   | 1 P:z      | 34 N(N)   |        |                |           |        |       |         |
| 2.60%   | 1 P:z      | 1 I(I)    |        |                |           |        |       |         |

**Table 7.**

Populations (%) of the Molecular Orbitals (MO) principally involved (weight=0.64) in the strongest TDDFT transition of dimer **1a** -DMF ( $\lambda=454$  nm,  $f=0.76$ , see Table 5). Atom numbering (in parentheses) as in Figure S1.

| E(eV)  | Occupation | MO        | %      | Atomic Orbital | Atom      |        |       |         |
|--------|------------|-----------|--------|----------------|-----------|--------|-------|---------|
| -9.732 | 2.00(HOMO) | 78 A      | 22.61% | 1 P:z          | 44 N(N)   |        |       |         |
|        |            |           | 12.73% | 1 P:z          | 2 C(C7)   |        |       |         |
|        |            |           | 12.53% | 1 P:z          | 10 C(C9)  |        |       |         |
|        |            |           | 7.64%  | 1 P:z          | 12 C(C13) |        |       |         |
|        |            |           | 6.43%  | 1 P:z          | 14 C(C11) |        |       |         |
|        |            |           | 6.18%  | 1 P:z          | 1 I(I)    |        |       |         |
|        |            |           | 6.15%  | 1 P:z          | 13 C(C12) |        |       |         |
|        |            |           | 3.75%  | 1 P:z          | 7 C(C3)   |        |       |         |
|        |            |           | 2.78%  | 1 P:z          | 9 C(C1)   |        |       |         |
|        |            |           | -7.571 | 0.00(LUMO)     | 79 A      | 20.63% | 1 P:z | 3 C(C8) |
|        |            |           |        |                |           | 14.45% | 1 P:z | 7 C(C3) |
| 10.25% | 1 P:z      | 4 C(C6)   |        |                |           |        |       |         |
| 9.75%  | 1 P:z      | 2 C(C7)   |        |                |           |        |       |         |
| 8.34%  | 1 P:z      | 5 C(C5)   |        |                |           |        |       |         |
| 7.39%  | 1 P:z      | 15 C(C10) |        |                |           |        |       |         |
| 7.35%  | 1 P:z      | 13 C(C12) |        |                |           |        |       |         |
| 4.98%  | 1 P:z      | 9 C(C1)   |        |                |           |        |       |         |
| 4.70%  | 1 P:z      | 11 C(C14) |        |                |           |        |       |         |
| 3.45%  | 1 P:z      | 44 N(N)   |        |                |           |        |       |         |
| 2.71%  | 1 P:z      | 8 C(C2)   |        |                |           |        |       |         |
| 2.59%  | 1 P:z      | 1 I(I)    |        |                |           |        |       |         |

**Table 8.**

Populations (%) of the Molecular Orbitals (MO) principally involved (weight=0.93) in the strongest TDDFT transition of dimer **1a** ·PIP ( $\lambda=448$  nm,  $f=1.11$ , see Table 5). Atom numbering (in parentheses) as in Figure S1.

| E(eV)  | Occupation  | MO        | %      | Atomic<br>Orbital | Atom      |        |       |         |
|--------|-------------|-----------|--------|-------------------|-----------|--------|-------|---------|
| -9.746 | 2.00 (HOMO) | 81 A      | 23.21% | 1 P:z             | 50 N(N)   |        |       |         |
|        |             |           | 12.95% | 1 P:z             | 2 C(C7)   |        |       |         |
|        |             |           | 12.84% | 1 P:z             | 10 C(C9)  |        |       |         |
|        |             |           | 7.87%  | 1 P:z             | 12 C(C13) |        |       |         |
|        |             |           | 6.60%  | 1 P:z             | 14 C(C11) |        |       |         |
|        |             |           | 6.22%  | 1 P:z             | 13 C(C12) |        |       |         |
|        |             |           | 4.31%  | 1 P:z             | 1 I(I)    |        |       |         |
|        |             |           | 3.89%  | 1 P:z             | 7 C(C3)   |        |       |         |
|        |             |           | 2.81%  | 1 P:z             | 9 C(C1)   |        |       |         |
|        |             |           | 2.76%  | 1 P:z             | 5 C(C5)   |        |       |         |
|        |             |           | 2.49%  | 1 P:z             | 3 C(C8)   |        |       |         |
|        |             |           | 2.11%  | 1 P:z             | 15 C(C10) |        |       |         |
|        |             |           | 2.00%  | 1 P:z             | 11 C(C14) |        |       |         |
|        |             |           | -7.568 | 0.00 (LUMO)       | 82 A      | 20.67% | 1 P:z | 3 C(C8) |
|        |             |           |        |                   |           | 14.46% | 1 P:z | 7 C(C3) |
|        |             |           |        |                   |           | 10.16% | 1 P:z | 4 C(C6) |
| 9.95%  | 1 P:z       | 2 C(C7)   |        |                   |           |        |       |         |
| 8.38%  | 1 P:z       | 5 C(C5)   |        |                   |           |        |       |         |
| 7.44%  | 1 P:z       | 15 C(C10) |        |                   |           |        |       |         |
| 7.40%  | 1 P:z       | 13 C(C12) |        |                   |           |        |       |         |
| 5.02%  | 1 P:z       | 9 C(C1)   |        |                   |           |        |       |         |
| 4.72%  | 1 P:z       | 11 C(C14) |        |                   |           |        |       |         |
| 3.45%  | 1 P:z       | 50 N(N)   |        |                   |           |        |       |         |
| 2.67%  | 1 P:z       | 8 C(C2)   |        |                   |           |        |       |         |
| 2.12%  | 1 P:z       | 1 I(I)    |        |                   |           |        |       |         |

**Table 9.**

Populations (%) of the Molecular Orbitals (MO) principally involved (weight=0.93) in the strongest TDDFT transition of dimer **1a** ·QUI ( $\lambda=447$  nm,  $f=1.14$ , see Table 5). Atom numbering (in parentheses) as in Figure S1.

| E(eV)  | Occupation  | MO        | %      | Atomic<br>Orbital | Atom      |        |       |         |
|--------|-------------|-----------|--------|-------------------|-----------|--------|-------|---------|
| -9.730 | 2.00 (HOMO) | 86 A      | 23.12% | 1 P:z             | 54 N(N)   |        |       |         |
|        |             |           | 12.98% | 1 P:z             | 2 C(C7)   |        |       |         |
|        |             |           | 12.81% | 1 P:z             | 10 C(C9)  |        |       |         |
|        |             |           | 7.83%  | 1 P:z             | 12 C(C13) |        |       |         |
|        |             |           | 6.57%  | 1 P:z             | 14 C(C11) |        |       |         |
|        |             |           | 6.25%  | 1 P:z             | 13 C(C12) |        |       |         |
|        |             |           | 4.48%  | 1 P:z             | 1 I(I)    |        |       |         |
|        |             |           | 3.91%  | 1 P:z             | 7 C(C3)   |        |       |         |
|        |             |           | 2.83%  | 1 P:z             | 9 C(C1)   |        |       |         |
|        |             |           | 2.77%  | 1 P:z             | 5 C(C5)   |        |       |         |
|        |             |           | 2.58%  | 1 P:z             | 3 C(C8)   |        |       |         |
|        |             |           | 2.14%  | 1 P:z             | 15 C(C10) |        |       |         |
|        |             |           | 2.03%  | 1 P:z             | 11 C(C14) |        |       |         |
|        |             |           | -7.546 | 0.00 (LUMO)       | 87 A      | 20.70% | 1 P:z | 3 C(C8) |
|        |             |           |        |                   |           | 14.38% | 1 P:z | 7 C(C3) |
|        |             |           |        |                   |           | 10.12% | 1 P:z | 2 C(C7) |
| 10.07% | 1 P:z       | 4 C(C6)   |        |                   |           |        |       |         |
| 8.38%  | 1 P:z       | 5 C(C5)   |        |                   |           |        |       |         |
| 7.51%  | 1 P:z       | 15 C(C10) |        |                   |           |        |       |         |

|       |       |           |
|-------|-------|-----------|
| 7.47% | 1 P:z | 13 C(C12) |
| 5.05% | 1 P:z | 9 C(C1)   |
| 4.73% | 1 P:z | 11 C(C14) |
| 3.47% | 1 P:z | 54 N(N)   |
| 2.62% | 1 P:z | 8 C(C2)   |
| 2.10% | 1 P:z | 1 I(I)    |

**Table 10.**

Optimized B3LYP/3-21G\*\* coordinates for compound **1a**

Standard orientation:

| Center Number | Atomic Number | Atomic Type | Coordinates (Angstroms) |           |           |
|---------------|---------------|-------------|-------------------------|-----------|-----------|
|               |               |             | X                       | Y         | Z         |
| 1             | 53            | 0           | 5.356173                | -0.118003 | 0.000034  |
| 2             | 6             | 0           | -1.000504               | 0.439274  | -0.000026 |
| 3             | 1             | 0           | -1.281931               | 1.482583  | 0.000029  |
| 4             | 6             | 0           | -1.950566               | -0.525090 | -0.000087 |
| 5             | 1             | 0           | -1.631505               | -1.556496 | -0.000137 |
| 6             | 6             | 0           | 0.438714                | 0.232649  | -0.000035 |
| 7             | 6             | 0           | 1.083963                | -1.010633 | 0.000036  |
| 8             | 6             | 0           | 2.468253                | -1.110559 | 0.000050  |
| 9             | 6             | 0           | 3.251836                | 0.035458  | -0.000005 |
| 10            | 6             | 0           | 2.641397                | 1.282858  | -0.000081 |
| 11            | 6             | 0           | 1.259479                | 1.371143  | -0.000096 |
| 12            | 9             | 0           | 0.353657                | -2.173762 | 0.000115  |
| 13            | 9             | 0           | 3.051442                | -2.343541 | 0.000148  |
| 14            | 9             | 0           | 3.394021                | 2.419240  | -0.000151 |
| 15            | 9             | 0           | 0.668042                | 2.607537  | -0.000171 |
| 16            | 6             | 0           | -3.391131               | -0.312909 | -0.000078 |
| 17            | 6             | 0           | -4.245652               | -1.433702 | -0.000071 |
| 18            | 1             | 0           | -3.810457               | -2.424522 | -0.000080 |
| 19            | 6             | 0           | -5.626443               | -1.306224 | -0.000027 |
| 20            | 1             | 0           | -6.232063               | -2.198195 | 0.000025  |
| 21            | 6             | 0           | -6.240327               | -0.028846 | 0.000020  |
| 22            | 6             | 0           | -5.380397               | 1.101651  | -0.000026 |
| 23            | 1             | 0           | -5.798015               | 2.095742  | -0.000096 |
| 24            | 6             | 0           | -4.003202               | 0.957732  | -0.000068 |
| 25            | 1             | 0           | -3.391891               | 1.849211  | -0.000124 |
| 26            | 7             | 0           | -7.611544               | 0.112059  | 0.000087  |
| 27            | 6             | 0           | -8.476289               | -1.078860 | -0.000466 |
| 28            | 1             | 0           | -8.308123               | -1.697722 | -0.887318 |
| 29            | 1             | 0           | -9.515898               | -0.758641 | -0.001005 |
| 30            | 1             | 0           | -8.309075               | -1.697950 | 0.886416  |
| 31            | 6             | 0           | -8.220801               | 1.451788  | 0.000627  |
| 32            | 1             | 0           | -7.933565               | 2.025393  | 0.887377  |
| 33            | 1             | 0           | -9.303426               | 1.345027  | 0.001405  |
| 34            | 1             | 0           | -7.934831               | 2.025676  | -0.886368 |

**Table 11.**

Optimized B3LYP/3-21G\*\* coordinates for compound **1b**

Standard orientation:

| Center Number | Atomic Number | Atomic Type | Coordinates (Angstroms) |           |           |
|---------------|---------------|-------------|-------------------------|-----------|-----------|
|               |               |             | X                       | Y         | Z         |
| 1             | 53            | 0           | -6.305466               | -0.264895 | 0.000070  |
| 2             | 9             | 0           | -1.169422               | -1.958964 | -0.000053 |
| 3             | 9             | 0           | -3.848137               | -2.321278 | 0.000038  |
| 4             | 9             | 0           | -4.528689               | 2.405272  | -0.000014 |
| 5             | 9             | 0           | -1.823805               | 2.787020  | -0.000131 |
| 6             | 6             | 0           | -1.981094               | -0.851938 | -0.000048 |
| 7             | 6             | 0           | -3.354446               | -1.050084 | 0.000002  |
| 8             | 6             | 0           | -4.217502               | 0.037449  | 0.000012  |
| 9             | 6             | 0           | -3.697014               | 1.325202  | -0.000028 |
| 10            | 6             | 0           | -2.324948               | 1.512347  | -0.000084 |
| 11            | 6             | 0           | -1.425768               | 0.434327  | -0.000097 |

|    |   |   |           |           |           |
|----|---|---|-----------|-----------|-----------|
| 12 | 6 | 0 | -0.006089 | 0.735877  | -0.000167 |
| 13 | 1 | 0 | 0.219542  | 1.793658  | -0.000286 |
| 14 | 6 | 0 | 1.014640  | -0.159645 | -0.000092 |
| 15 | 1 | 0 | 0.790092  | -1.215907 | 0.000037  |
| 16 | 6 | 0 | 2.402317  | 0.224377  | -0.000165 |
| 17 | 1 | 0 | 2.620544  | 1.286373  | -0.000374 |
| 18 | 6 | 0 | 3.409326  | -0.686638 | -0.000011 |
| 19 | 1 | 0 | 3.133235  | -1.737188 | 0.000104  |
| 20 | 6 | 0 | 4.840441  | -0.428335 | -0.000001 |
| 21 | 6 | 0 | 5.405666  | 0.864814  | 0.000488  |
| 22 | 1 | 0 | 4.761624  | 1.732929  | 0.001029  |
| 23 | 6 | 0 | 6.776792  | 1.059968  | 0.000452  |
| 24 | 1 | 0 | 7.157122  | 2.068943  | 0.001013  |
| 25 | 6 | 0 | 7.678634  | -0.037042 | -0.000102 |
| 26 | 6 | 0 | 7.112660  | -1.336443 | -0.000501 |
| 27 | 1 | 0 | 7.751222  | -2.205107 | -0.000940 |
| 28 | 6 | 0 | 5.737942  | -1.516180 | -0.000453 |
| 29 | 1 | 0 | 5.341534  | -2.523270 | -0.000818 |
| 30 | 7 | 0 | 9.043976  | 0.154566  | -0.000189 |
| 31 | 6 | 0 | 9.952307  | -1.003391 | 0.000784  |
| 32 | 1 | 0 | 9.806912  | -1.628192 | 0.887552  |
| 33 | 1 | 0 | 10.979309 | -0.644690 | 0.001779  |
| 34 | 1 | 0 | 9.808680  | -1.628433 | -0.886122 |
| 35 | 6 | 0 | 9.603203  | 1.515910  | -0.000383 |
| 36 | 1 | 0 | 10.689042 | 1.449240  | -0.002172 |
| 37 | 1 | 0 | 9.296915  | 2.078345  | 0.887182  |
| 38 | 1 | 0 | 9.294145  | 2.078898  | -0.886599 |

**Table 12.**

Optimized B3LYP/3-21G\*\* coordinates for compound **2**

Standard orientation:

| Center Number | Atomic Number | Atomic Type | Coordinates (Angstroms) |           |           |
|---------------|---------------|-------------|-------------------------|-----------|-----------|
|               |               |             | X                       | Y         | Z         |
| 1             | 1             | 0           | -7.258694               | -0.408127 | 0.000137  |
| 2             | 9             | 0           | -3.093916               | -2.142585 | -0.000270 |
| 3             | 9             | 0           | -5.768931               | -2.570651 | -0.000152 |
| 4             | 9             | 0           | -6.570221               | 2.129857  | 0.000330  |
| 5             | 9             | 0           | -3.870533               | 2.586192  | 0.000203  |
| 6             | 6             | 0           | -3.936079               | -1.057661 | -0.000122 |
| 7             | 6             | 0           | -5.305080               | -1.286035 | -0.000062 |
| 8             | 6             | 0           | -6.197080               | -0.225642 | 0.000090  |
| 9             | 6             | 0           | -5.707662               | 1.071334  | 0.000178  |
| 10            | 6             | 0           | -4.341182               | 1.299127  | 0.000115  |
| 11            | 6             | 0           | -3.416906               | 0.243042  | -0.000035 |
| 12            | 6             | 0           | -2.003796               | 0.581276  | -0.000086 |
| 13            | 1             | 0           | -1.806155               | 1.644732  | -0.000047 |
| 14            | 6             | 0           | -0.959818               | -0.285890 | -0.000155 |
| 15            | 1             | 0           | -1.154532               | -1.348067 | -0.000180 |
| 16            | 6             | 0           | 0.417112                | 0.138474  | -0.000180 |
| 17            | 1             | 0           | 0.602606                | 1.206714  | -0.000201 |
| 18            | 6             | 0           | 1.451855                | -0.739995 | -0.000169 |
| 19            | 1             | 0           | 1.210321                | -1.798982 | -0.000177 |
| 20            | 6             | 0           | 2.874500                | -0.434077 | -0.000138 |
| 21            | 6             | 0           | 3.395184                | 0.877361  | 0.000132  |
| 22            | 1             | 0           | 2.721949                | 1.723077  | 0.000386  |
| 23            | 6             | 0           | 4.759036                | 1.119412  | 0.000174  |
| 24            | 1             | 0           | 5.104684                | 2.140805  | 0.000506  |
| 25            | 6             | 0           | 5.697751                | 0.054153  | -0.000072 |
| 26            | 6             | 0           | 5.176746                | -1.263490 | -0.000305 |
| 27            | 1             | 0           | 5.844772                | -2.109697 | -0.000522 |
| 28            | 6             | 0           | 3.808603                | -1.490348 | -0.000340 |
| 29            | 1             | 0           | 3.446811                | -2.510431 | -0.000546 |
| 30            | 7             | 0           | 7.056252                | 0.293010  | -0.000050 |
| 31            | 6             | 0           | 8.004477                | -0.832137 | 0.000852  |
| 32            | 1             | 0           | 7.881699                | -1.461936 | 0.887639  |
| 33            | 1             | 0           | 9.018300                | -0.437426 | 0.001600  |
| 34            | 1             | 0           | 7.883121                | -1.462274 | -0.885900 |
| 35            | 6             | 0           | 7.567198                | 1.672961  | -0.000250 |
| 36            | 1             | 0           | 8.654745                | 1.644497  | -0.001453 |
| 37            | 1             | 0           | 7.240863                | 2.224676  | 0.886973  |
| 38            | 1             | 0           | 7.238999                | 2.224859  | -0.886640 |

**Table 13.**

Optimized B3LYP/3-21G\*\* coordinates for dimer **1a**-DMF

Standard orientation:

| Center Number | Atomic Number | Atomic Type | Coordinates (Angstroms) |           |           |
|---------------|---------------|-------------|-------------------------|-----------|-----------|
|               |               |             | X                       | Y         | Z         |
| 1             | 53            | 0           | 3.758397                | -0.272694 | -0.006939 |
| 2             | 6             | 0           | -2.612902               | 0.433096  | -0.001835 |
| 3             | 1             | 0           | -2.873300               | 1.482147  | -0.002108 |
| 4             | 6             | 0           | -3.580450               | -0.511818 | -0.000255 |
| 5             | 1             | 0           | -3.280356               | -1.548774 | -0.000047 |
| 6             | 6             | 0           | -1.175979               | 0.198132  | -0.003299 |
| 7             | 6             | 0           | -0.556734               | -1.057543 | -0.003349 |
| 8             | 6             | 0           | 0.825303                | -1.182792 | -0.004748 |
| 9             | 6             | 0           | 1.640509                | -0.059215 | -0.006103 |
| 10            | 6             | 0           | 1.048529                | 1.196489  | -0.006166 |
| 11            | 6             | 0           | -0.331387               | 1.318012  | -0.004758 |
| 12            | 9             | 0           | -1.313149               | -2.205989 | -0.002077 |
| 13            | 9             | 0           | 1.377430                | -2.432871 | -0.004750 |
| 14            | 9             | 0           | 1.820879                | 2.323895  | -0.007593 |
| 15            | 9             | 0           | -0.898698               | 2.568036  | -0.004833 |
| 16            | 6             | 0           | -5.019338               | -0.273937 | 0.001276  |
| 17            | 6             | 0           | -5.892071               | -1.379814 | 0.002843  |
| 18            | 1             | 0           | -5.472976               | -2.377572 | 0.002835  |
| 19            | 6             | 0           | -7.271347               | -1.229831 | 0.004415  |
| 20            | 1             | 0           | -7.891030               | -2.112193 | 0.005505  |
| 21            | 6             | 0           | -7.864175               | 0.056488  | 0.004496  |
| 22            | 6             | 0           | -6.986479               | 1.172111  | 0.002930  |
| 23            | 1             | 0           | -7.387826               | 2.173003  | 0.003009  |
| 24            | 6             | 0           | -5.610738               | 1.005700  | 0.001362  |
| 25            | 1             | 0           | -4.984429               | 1.886802  | 0.000231  |
| 26            | 7             | 0           | -9.235201               | 0.219139  | 0.006060  |
| 27            | 6             | 0           | -10.117052              | -0.957965 | 0.007983  |
| 28            | 1             | 0           | -9.960453               | -1.580772 | -0.878521 |
| 29            | 1             | 0           | -11.152003              | -0.622479 | 0.009413  |
| 30            | 1             | 0           | -9.957730               | -1.579844 | 0.894644  |
| 31            | 6             | 0           | -9.822421               | 1.567572  | 0.005722  |
| 32            | 1             | 0           | -9.526342               | 2.138077  | 0.891840  |
| 33            | 1             | 0           | -10.906803              | 1.478430  | 0.006436  |
| 34            | 1             | 0           | -9.527469               | 2.137043  | -0.881428 |
| 35            | 8             | 0           | 6.414776                | -0.521887 | 0.001498  |
| 36            | 6             | 0           | 7.192592                | 0.459139  | 0.004289  |
| 37            | 1             | 0           | 6.843421                | 1.495418  | 0.000333  |
| 38            | 7             | 0           | 8.543629                | 0.352367  | 0.012417  |
| 39            | 6             | 0           | 9.417375                | 1.533531  | 0.015598  |
| 40            | 1             | 0           | 8.805862                | 2.436238  | 0.010179  |
| 41            | 1             | 0           | 10.049167               | 1.542266  | 0.907081  |
| 42            | 1             | 0           | 10.060049               | 1.538892  | -0.868078 |
| 43            | 6             | 0           | 9.165361                | -0.986330 | 0.019037  |
| 44            | 1             | 0           | 9.789892                | -1.119004 | -0.866932 |
| 45            | 1             | 0           | 9.778780                | -1.115316 | 0.913272  |
| 46            | 1             | 0           | 8.351588                | -1.708771 | 0.015431  |

**Table 14.**

Optimized B3LYP/3-21G\*\* coordinates for dimer **1a**-PIP

Standard orientation:

| Center Number | Atomic Number | Atomic Type | Coordinates (Angstroms) |           |           |
|---------------|---------------|-------------|-------------------------|-----------|-----------|
|               |               |             | X                       | Y         | Z         |
| 1             | 53            | 0           | 3.594071                | -0.065764 | -0.199393 |
| 2             | 6             | 0           | -2.815400               | 0.444486  | 0.004129  |
| 3             | 1             | 0           | -3.102511               | 1.485131  | 0.058467  |
| 4             | 6             | 0           | -3.758782               | -0.523938 | -0.020247 |
| 5             | 1             | 0           | -3.433670               | -1.551917 | -0.075261 |
| 6             | 6             | 0           | -1.372976               | 0.249931  | -0.039099 |
| 7             | 6             | 0           | -0.720142               | -0.986525 | -0.111284 |
| 8             | 6             | 0           | 0.664962                | -1.070071 | -0.151966 |
| 9             | 6             | 0           | 1.447760                | 0.074206  | -0.122297 |
| 10            | 6             | 0           | 0.821790                | 1.309823  | -0.049288 |
| 11            | 6             | 0           | -0.560487               | 1.392912  | -0.008333 |
| 12            | 9             | 0           | -1.446254               | -2.154545 | -0.144753 |



|    |   |   |            |           |           |
|----|---|---|------------|-----------|-----------|
| 13 | 9 | 0 | 1.251962   | -2.303932 | -0.223921 |
| 14 | 9 | 0 | 1.562802   | 2.458809  | -0.018062 |
| 15 | 9 | 0 | -1.162933  | 2.624592  | 0.063493  |
| 16 | 6 | 0 | -5.202770  | -0.320314 | 0.020241  |
| 17 | 6 | 0 | -6.051792  | -1.443821 | -0.016162 |
| 18 | 1 | 0 | -5.611845  | -2.430919 | -0.073456 |
| 19 | 6 | 0 | -7.433887  | -1.324542 | 0.019245  |
| 20 | 1 | 0 | -8.034941  | -2.219267 | -0.010606 |
| 21 | 6 | 0 | -8.053443  | -0.053176 | 0.094116  |
| 22 | 6 | 0 | -7.199638  | 1.080146  | 0.130371  |
| 23 | 1 | 0 | -7.621747  | 2.070881  | 0.186843  |
| 24 | 6 | 0 | -5.821090  | 0.944343  | 0.094390  |
| 25 | 1 | 0 | -5.214024  | 1.838232  | 0.124517  |
| 26 | 7 | 0 | -9.427339  | 0.079809  | 0.130609  |
| 27 | 6 | 0 | -10.285126 | -1.113994 | 0.087300  |
| 28 | 1 | 0 | -10.131747 | -1.687665 | -0.832339 |
| 29 | 1 | 0 | -11.326438 | -0.800712 | 0.122893  |
| 30 | 1 | 0 | -10.097961 | -1.776759 | 0.938251  |
| 31 | 6 | 0 | -10.041234 | 1.413822  | 0.211834  |
| 32 | 1 | 0 | -9.731346  | 1.946560  | 1.116473  |
| 33 | 1 | 0 | -11.123153 | 1.301595  | 0.238215  |
| 34 | 1 | 0 | -9.782987  | 2.032073  | -0.653959 |
| 35 | 6 | 0 | 8.426132   | 1.111776  | -0.212974 |
| 36 | 6 | 0 | 6.881070   | 1.138421  | -0.137096 |
| 37 | 7 | 0 | 6.273960   | -0.223650 | -0.337853 |
| 38 | 6 | 0 | 6.833682   | -1.228779 | 0.631649  |
| 39 | 6 | 0 | 8.378402   | -1.307150 | 0.572787  |
| 40 | 6 | 0 | 8.996112   | 0.095118  | 0.809524  |
| 41 | 1 | 0 | 6.561370   | 1.484496  | 0.847622  |
| 42 | 1 | 0 | 6.452952   | 1.808269  | -0.882960 |
| 43 | 1 | 0 | 8.734455   | 0.826101  | -1.223306 |
| 44 | 1 | 0 | 8.816993   | 2.113367  | -0.017780 |
| 45 | 1 | 0 | 6.514806   | -0.918029 | 1.628305  |
| 46 | 1 | 0 | 6.372892   | -2.193040 | 0.416608  |
| 47 | 1 | 0 | 8.735186   | -2.016224 | 1.323804  |
| 48 | 1 | 0 | 8.685474   | -1.680902 | -0.408796 |
| 49 | 1 | 0 | 8.751330   | 0.428970  | 1.822520  |
| 50 | 1 | 0 | 10.084121  | 0.047969  | 0.730962  |
| 51 | 1 | 0 | 6.441646   | -0.536170 | -1.290371 |

**Table 15.**

Optimized B3LYP/3-21G\*\* coordinates for dimer **1a-QUI**

Standard orientation:

| Center Number | Atomic Number | Atomic Type | Coordinates (Angstroms) |           |           |
|---------------|---------------|-------------|-------------------------|-----------|-----------|
|               |               |             | X                       | Y         | Z         |
| 1             | 53            | 0           | -3.213329               | 0.058133  | -0.014972 |
| 2             | 6             | 0           | 3.208707                | 0.467957  | -0.013813 |
| 3             | 1             | 0           | 3.515291                | 1.504520  | -0.011133 |
| 4             | 6             | 0           | 4.133803                | -0.518346 | -0.011342 |
| 5             | 1             | 0           | 3.789242                | -1.541524 | -0.014602 |
| 6             | 6             | 0           | 1.762033                | 0.298565  | -0.018385 |
| 7             | 6             | 0           | 1.086766                | -0.927838 | -0.021192 |
| 8             | 6             | 0           | -0.300275               | -0.987941 | -0.022599 |
| 9             | 6             | 0           | -1.062738               | 0.170436  | -0.021413 |
| 10            | 6             | 0           | -0.414446               | 1.396628  | -0.019849 |
| 11            | 6             | 0           | 0.970016                | 1.456346  | -0.018363 |
| 12            | 9             | 0           | 1.791701                | -2.109500 | -0.021836 |
| 13            | 9             | 0           | -0.909551               | -2.213274 | -0.024146 |
| 14            | 9             | 0           | -1.134902               | 2.559205  | -0.018594 |
| 15            | 9             | 0           | 1.595151                | 2.678995  | -0.015891 |
| 16            | 6             | 0           | 5.581962                | -0.341105 | -0.003401 |
| 17            | 6             | 0           | 6.409111                | -1.481517 | -0.003744 |
| 18            | 1             | 0           | 5.949821                | -2.461480 | -0.010907 |
| 19            | 6             | 0           | 7.793723                | -1.387895 | 0.004968  |
| 20            | 1             | 0           | 8.377514                | -2.294567 | 0.004357  |
| 21            | 6             | 0           | 8.438224                | -0.126731 | 0.014845  |
| 22            | 6             | 0           | 7.606489                | 1.023603  | 0.014971  |
| 23            | 1             | 0           | 8.047966                | 2.007521  | 0.022413  |
| 24            | 6             | 0           | 6.225116                | 0.913347  | 0.006094  |
| 25            | 1             | 0           | 5.635588                | 1.819467  | 0.007093  |
| 26            | 7             | 0           | 9.814861                | -0.019120 | 0.024221  |
| 27            | 6             | 0           | 10.649364               | -1.230231 | 0.023763  |
| 28            | 1             | 0           | 10.461504               | -1.850029 | 0.906398  |
| 29            | 1             | 0           | 11.696817               | -0.935954 | 0.031603  |

---

|    |   |   |           |           |           |
|----|---|---|-----------|-----------|-----------|
| 30 | 1 | 0 | 10.472417 | -1.841654 | -0.866911 |
| 31 | 6 | 0 | 10.455164 | 1.304896  | 0.035451  |
| 32 | 1 | 0 | 10.188657 | 1.890828  | -0.850108 |
| 33 | 1 | 0 | 11.535180 | 1.172735  | 0.042381  |
| 34 | 1 | 0 | 10.176168 | 1.881727  | 0.923132  |
| 35 | 6 | 0 | -8.483254 | -0.245995 | 0.039176  |
| 36 | 6 | 0 | -8.034007 | 1.047112  | -0.690492 |
| 37 | 6 | 0 | -6.463753 | 1.089314  | -0.710758 |
| 38 | 7 | 0 | -5.886245 | -0.099284 | 0.009599  |
| 39 | 6 | 0 | -6.371913 | -0.108428 | 1.433822  |
| 40 | 6 | 0 | -7.937339 | -0.222100 | 1.490753  |
| 41 | 1 | 0 | -6.075953 | 1.067196  | -1.728616 |
| 42 | 1 | 0 | -8.428024 | 1.052280  | -1.708616 |
| 43 | 1 | 0 | -8.433002 | 1.920795  | -0.171477 |
| 44 | 1 | 0 | -8.361819 | 0.625905  | 2.031780  |
| 45 | 1 | 0 | -6.018952 | 0.811401  | 1.898949  |
| 46 | 1 | 0 | -5.889470 | -0.947411 | 1.934048  |
| 47 | 1 | 0 | -8.234962 | -1.134551 | 2.011227  |
| 48 | 1 | 0 | -6.080321 | 1.983377  | -0.220550 |
| 49 | 6 | 0 | -6.324127 | -1.363929 | -0.678803 |
| 50 | 1 | 0 | -5.910353 | -1.343384 | -1.686315 |
| 51 | 1 | 0 | -5.869471 | -2.195665 | -0.141892 |
| 52 | 6 | 0 | -7.891057 | -1.473881 | -0.701608 |
| 53 | 1 | 0 | -8.256574 | -1.494747 | -1.730148 |
| 54 | 1 | 0 | -8.215922 | -2.393508 | -0.211082 |
| 55 | 1 | 0 | -9.572232 | -0.307940 | 0.051443  |

---
